# Supplementary material for: Ion mobility spectrometry experiments should be carried out at high temperatures to reduce uncertainties in the measurement of reduced mobilities
Source: Royal Society of Chemistry journal article supplement (doi:10.1039/d1ay00674f), 2021-01-01
Supplement: d1ay00674f1.pdf [file d1ay00674f1.pdf]

## High temperatures to obtain ion mobilities decreasing uncertainties caused by clustering

Roberto Fernández-Maestre,<sup>1</sup> Martha C. Daza<sup>2</sup>

Fig. S1 Photograph of the IMS-MS instrument

Fig. S2 Structures of compounds

Fig. S3  $K_0$  behavior of phenylalanine and tryptophan with buffer gas temperature and contaminant concentration

Fig. S4-S6 Additional spectra

Tables S1-S6 Complete data tables

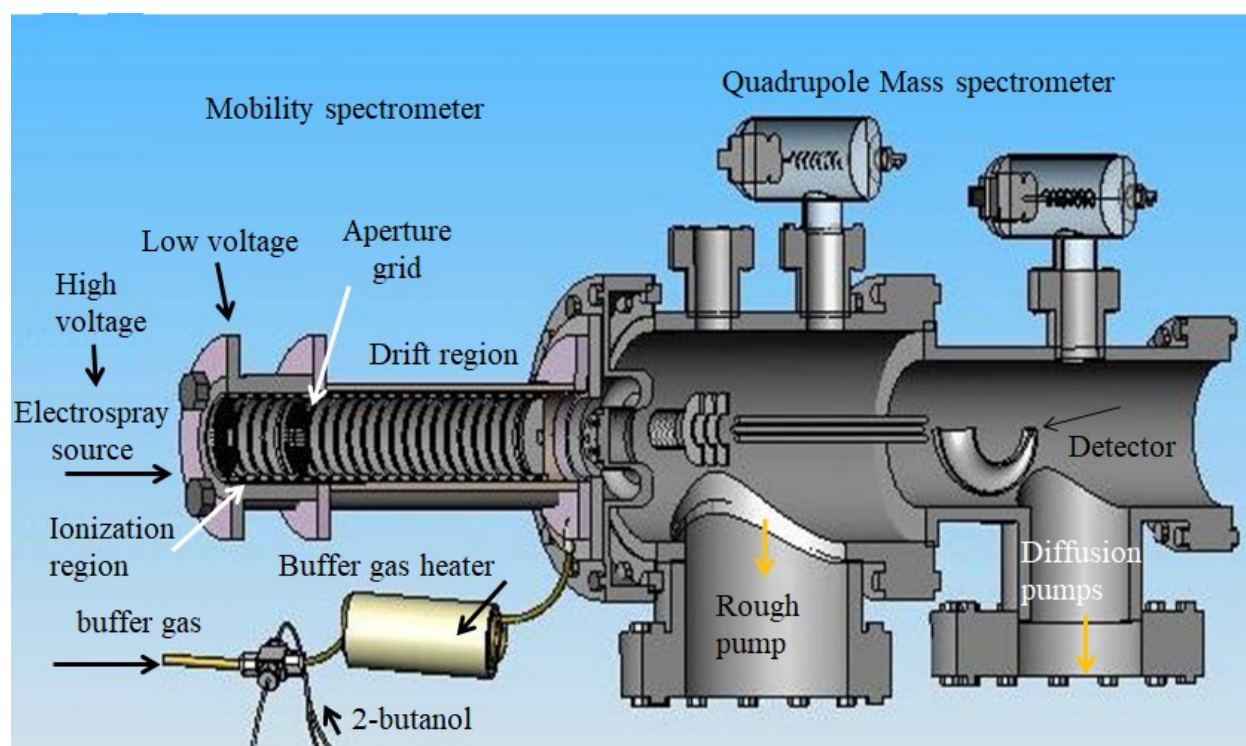

**Fig. S1** Cross section of the IMS-MS instrument

<sup>1</sup> Departamento de Química, Campus de San Pablo, Universidad de Cartagena, Cartagena, Colombia. rfernandezm@unicartagena.edu.co  
Moscow Engineering Physics Institute. National Research Nuclear University. Russia Orcid ID 0000-0001-6791-5318

<sup>2</sup> Grupo de Bioquímica Teórica, Universidad Industrial de Santander, Cra 27 Calle 9, Bucaramanga, Colombia.

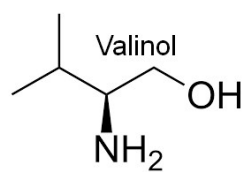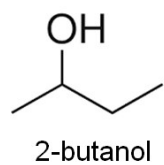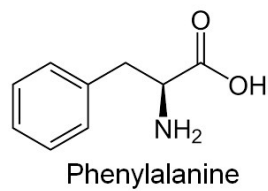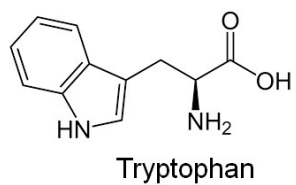

**Fig. S2** Structures of compounds used in this study

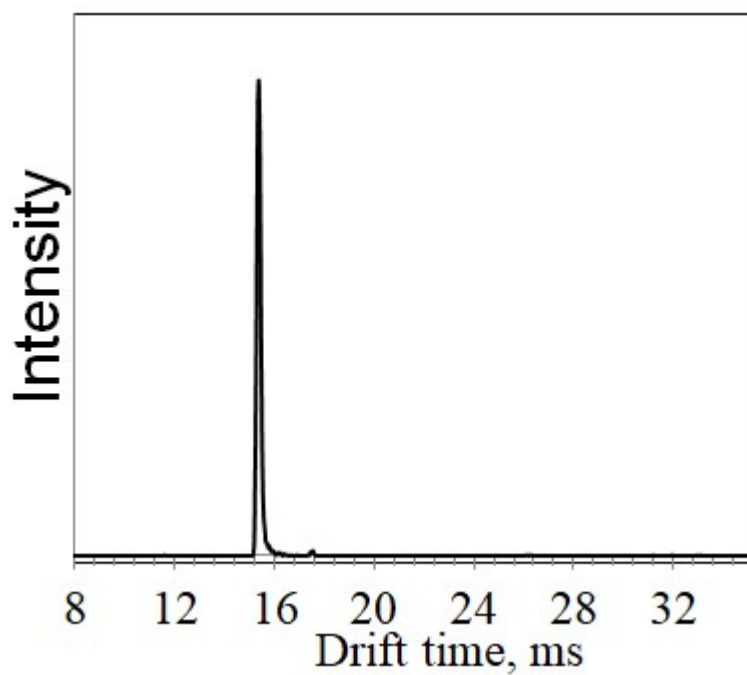

**Fig. S3** SIM spectrum of the ESI solution when  $6.8 \text{ mmol m}^{-3}$  of 2-butanol were injected in the buffer gas at  $100 \text{ }^\circ\text{C}$ . The spectrum was obtained at  $m/z$  54-56.

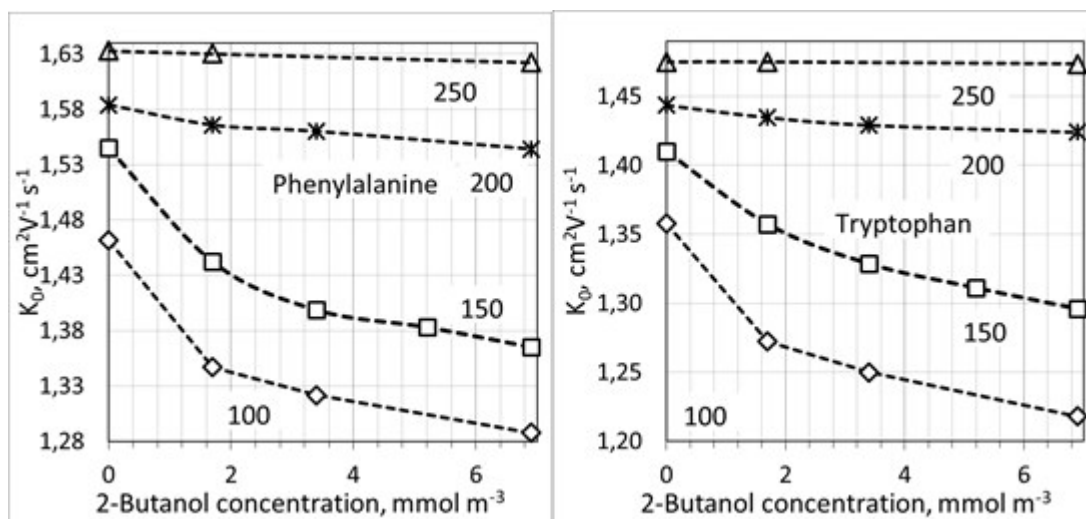

**Fig. S4**  $K_0$  behavior of phenylalanine and tryptophan (100- $\mu\text{M}$  solution) with the increase in buffer gas temperature and contaminant concentration. Changes in reduced mobilities as buffer gas temperature increased were produced by a reduction in clustering with 2-butanol and, as concentration of 2-butanol increased, by an increased clustering. Other experimental conditions were kept constant.  $K_0$ s were obtained with Equation 3; DTBP was the chemical standard in similar experimental conditions,  $K_0$  1.42  $\text{cm}^2\text{V}^{-1}\text{s}^{-1}$ .<sup>7</sup>

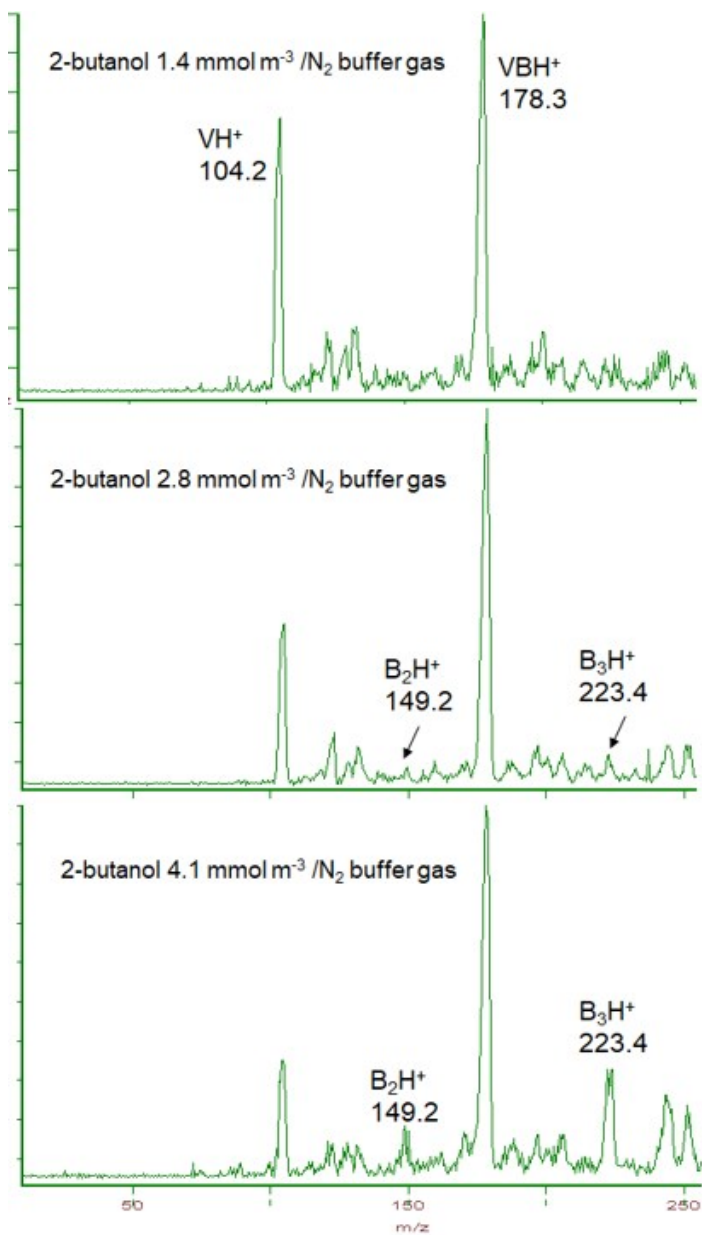

**Fig. S5** Effect of 2-butanol concentration in the buffer gas on the abundance of clusters in the mass spectra of valinol at 150°C. Other experimental conditions were kept constant. As the 2-butanol concentration increases, the ratio VBH<sup>+</sup> / VH<sup>+</sup> increases due to extensive clustering. Other cluster peaks such as VH<sub>3</sub>O, B<sub>3</sub>H<sup>+</sup> and VBH<sub>3</sub>O<sup>+</sup> also increase for the same reason.

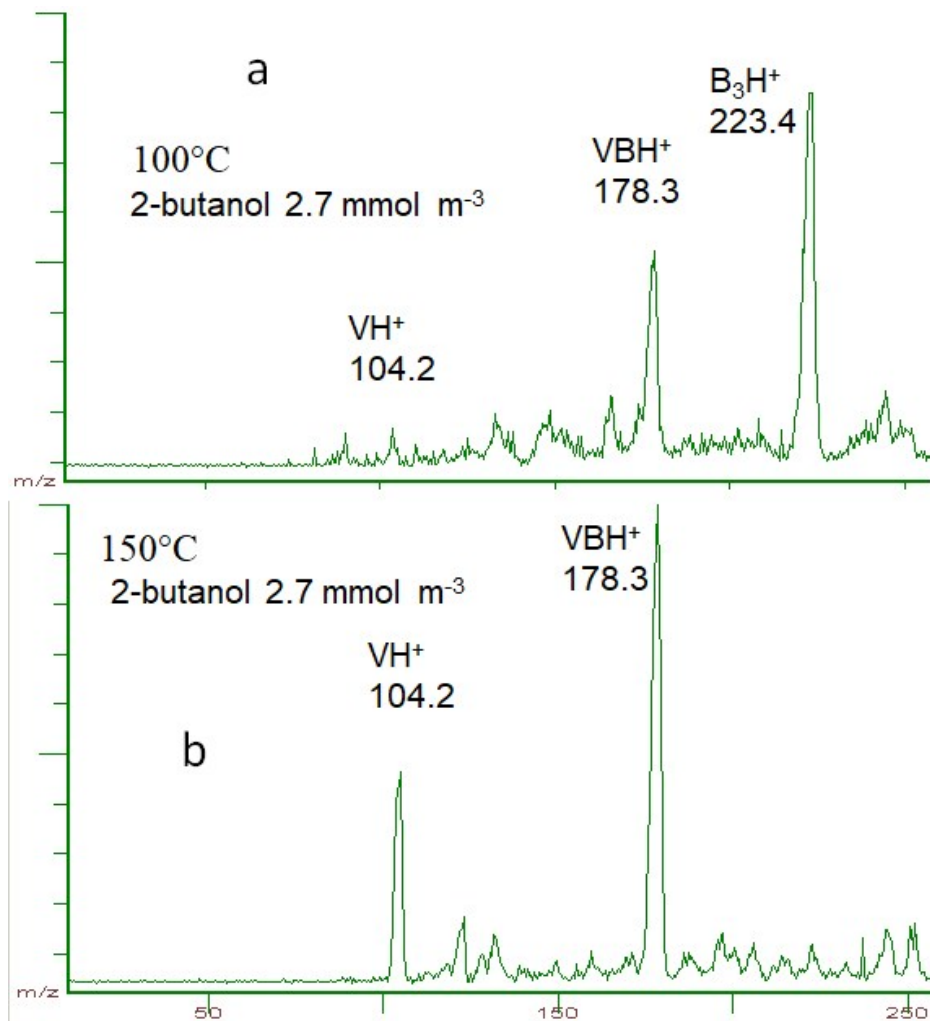

**Fig. S6** Mass spectra of valinol at 100°C and 150°C at the same 2-butanol concentration, 2.7 mmol m<sup>-3</sup>. Other experimental conditions were kept constant. At 100°C, the protonated valinol peak is very small and the ratio VBH<sup>+</sup> / VH<sup>+</sup> is large due to extensive clustering with 2-butanol; also, a large peak of butanol clusters at *m/z* 223 is observed. At ~150°C, the breaking of bonds starts and the ratio VBH<sup>+</sup> / VH<sup>+</sup> is lower than at 100°C and the peak of butanol clusters at *m/z* 223 disappears.

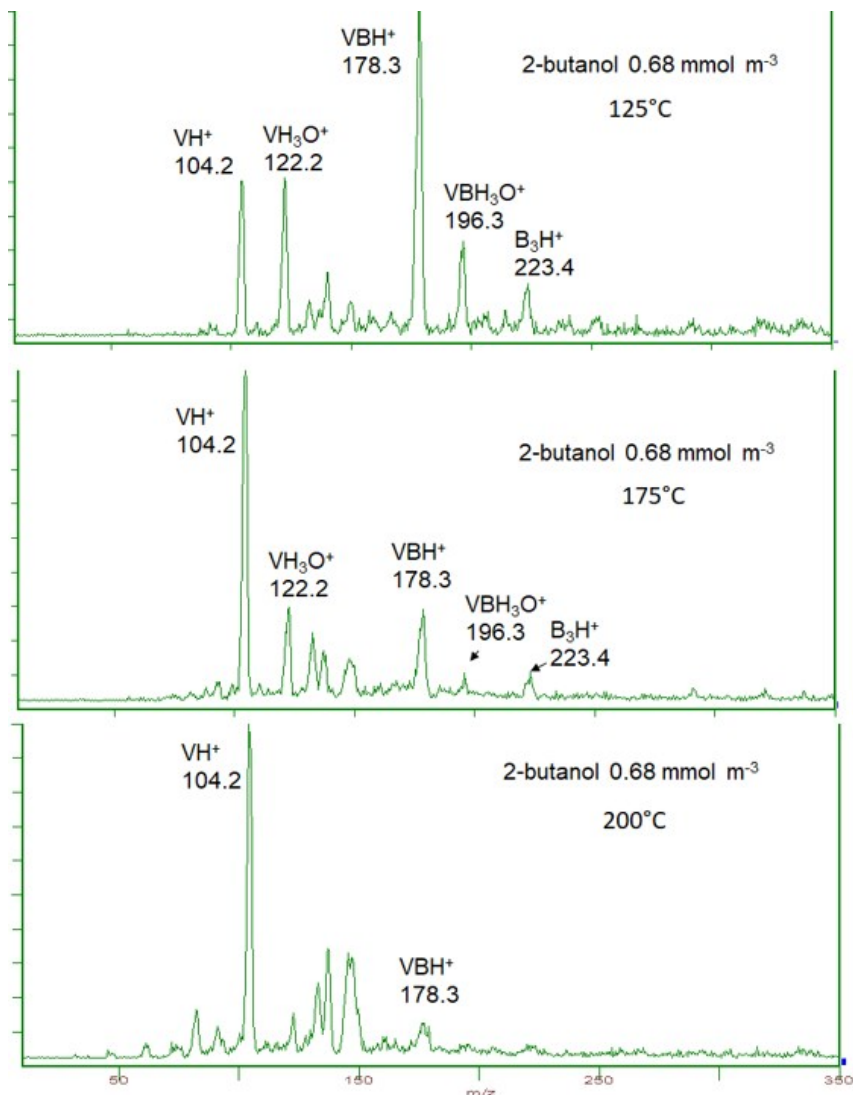

**Fig. S7** Mass spectra of valinol at 100, 175 and 200°C with 0.68 mmol m<sup>-3</sup> of 2-butanol in the buffer gas. Other experimental conditions were kept constant. The ratio VBH<sup>+</sup> / VH<sup>+</sup> decreases due to breaking of the clusters with increasing temperatures. Other cluster peaks such as VH<sub>3</sub>O, B<sub>3</sub>H<sup>+</sup> and VBH<sub>3</sub>O<sup>+</sup> also decrease due to bond breaking at high temperatures.

Table S1. Mobility data for valinol (V, 104.2 Da); phenylalanine (Phe, 166.2 Da) and tryptophan (Try, 205.2 Da) at 100°C at different 2-butanol concentrations (*B*, mmol m<sup>-3</sup>) in the buffer gas.

| Ion | $K_0$ | $K_0$ RSD | Drift time, ms | Drift time SD | <i>n</i> | <i>fr</i> | <i>B</i> | $\Delta K_{0,c}$ (%) | <i>P</i> | Ko corrected by pressure change | Uncertainty of $K_0$ corrected by pressure change |
|-----|-------|-----------|----------------|---------------|----------|-----------|----------|----------------------|----------|---------------------------------|---------------------------------------------------|
| V   | 1.785 | 0.230     | 21.47          | 0.049         | 9        | 0         | 0        | -                    | 701.0    | 1.779                           | 0,0063                                            |
| V   | 1.605 | 0.290     | 23.88          | 0.069         | 11       | 12.5      | 1.7      | -9.8                 | 699.0    | 1.604                           | 0,0064                                            |
| V   | 1.563 | 0.200     | 24.52          | 0.049         | 9        | 25        | 3.4      | -11.9                | 697.0    | 1.567                           | 0,0053                                            |
| V   | 1.523 | 0.040     | 25.16          | 0.010         | 4        | 50        | 6.8      | -14.2                | 697.0    | 1.527                           | 0,0042                                            |
| Phe | 1.463 | 0.150     | 26.19          | 0.039         | 7        | 0         | 0        | -                    | 699.5    | 1.462                           | 0,0045                                            |
| Phe | 1.347 | 0.220     | 28.44          | 0.063         | 5        | 12.5      | 1.7      | -7.9                 | 699.0    | 1.347                           | 0,0047                                            |
| Phe | 1.318 | 0.140     | 29.07          | 0.041         | 7        | 25        | 3.4      | -9.6                 | 697.0    | 1.322                           | 0,0041                                            |
| Phe | 1.285 | 0.170     | 29.83          | 0.051         | 7        | 50        | 6.8      | -11.9                | 697.0    | 1.288                           | 0,0041                                            |
| Try | 1.359 | 0.210     | 28.19          | 0.059         | 8        | 0         | 0        | -                    | 699.5    | 1.358                           | 0,0047                                            |
| Try | 1.273 | 0.130     | 30.11          | 0.039         | 10       | 12.5      | 1.7      | -6.3                 | 699.0    | 1.272                           | 0,0038                                            |
| Try | 1.247 | 0.032     | 30.74          | 0.010         | 6        | 25        | 3.4      | -8.0                 | 697.0    | 1.250                           | 0,0034                                            |
| Try | 1.215 | 0.063     | 31.54          | 0.020         | 6        | 50        | 6.8      | -10.3                | 697.0    | 1.218                           | 0,0034                                            |

SD: drift time standard deviation. *n*: number of measurements. *fr*: 2-butanol flow rate,  $\mu\text{L/hr}$ . *B*: 2-butanol concentrations (mmol m<sup>-3</sup>) in the buffer gas.  $\Delta K_{0,c}$ : percent reduction in ion mobility when the buffer gas contaminant concentration was increased. *P*: pressure, mmHg. The values of  $\Delta K_{0,c}$  were obtained as follows, for example:  $-9.8 = (1.604-1.779)/1.779 \times 100$ ;  $-14.2 = (1.527-1.779)/1.779 \times 100$  etc.



Table S2. Mobility data for valinol (V, 104.2 Da); phenylalanine (Phe, 166.2 Da) and tryptophan (Try, 205.2 Da) at 150°C at different 2-butanol concentrations ( $B$ , mmol m<sup>-3</sup>) in the buffer gas.

| Ion | $K_0$ | $K_0$ RSD | Drift time, ms | SD    | $n$ | $fr$ | $B$ | $\Delta K_{0,c}$ (%) | $P$   | Ko corrected by pressure change | Uncertainty of $K_0$ corrected by pressure change |
|-----|-------|-----------|----------------|-------|-----|------|-----|----------------------|-------|---------------------------------|---------------------------------------------------|
| V   | 1.845 | 0.106     | 18.81          | 0.020 | 5   | 0    | 0   | -                    | 698.0 | 1.845                           | 0,0054                                            |
| V   | 1.845 | 0.159     | 18.89          | 0.030 | 5   | 0    | 0   | -                    | 699.0 | 1.845                           | 0,0058                                            |
| V   | 1.783 | 0.205     | 19.54          | 0.040 | 7   | 12.5 | 1.7 | -3.4                 | 699.0 | 1.783                           | 0,0061                                            |
| V   | 1.737 | 0.199     | 20.10          | 0.040 | 5   | 25   | 3.4 | -6.2                 | 697.5 | 1.731                           | 0,0058                                            |
| V   | 1.703 | 0.196     | 20.44          | 0.040 | 7   | 37.5 | 5.1 | -7.7                 | 697.5 | 1.703                           | 0,0057                                            |
| V   | 1.677 | 0.144     | 20.82          | 0.030 | 8   | 50   | 6.8 | -9.4                 | 697.5 | 1.671                           | 0,0051                                            |
| Phe | 1.523 | 0.133     | 22.55          | 0.030 | 6   | 0    | 0   | -                    | 699.0 | 1.545                           | 0,0047                                            |
| Phe | 1.442 | 0.124     | 24.16          | 0.030 | 7   | 12.5 | 1.7 | -6.7                 | 699.0 | 1.442                           | 0,0043                                            |
| Phe | 1.403 | 0.121     | 24.88          | 0.030 | 6   | 25   | 3.4 | -9.4                 | 697.5 | 1.399                           | 0,0042                                            |
| Phe | 1.383 | 0.159     | 25.16          | 0.040 | 7   | 37.5 | 5.1 | -10.5                | 697.5 | 1.383                           | 0,0044                                            |
| Phe | 1.368 | 0.118     | 25.49          | 0.030 | 8   | 50   | 6.8 | -11.7                | 697.5 | 1.365                           | 0,0040                                            |
| Try | 1.400 | 0.121     | 24.71          | 0.030 | 6   | 0    | 0   | -                    | 699.0 | 1.410                           | 0,0042                                            |
| Try | 1.357 | 0.156     | 25.67          | 0.040 | 7   | 12.5 | 1.7 | -3.8                 | 699.0 | 1.357                           | 0,0043                                            |
| Try | 1.329 | 0.080     | 26.19          | 0.021 | 3   | 25   | 3.4 | -5.7                 | 697.5 | 1.329                           | 0,0038                                            |
| Try | 1.311 | 0.151     | 26.54          | 0.040 | 8   | 37.5 | 5.1 | -7.0                 | 697.5 | 1.311                           | 0,0041                                            |
| Try | 1.299 | 0.074     | 26.85          | 0.020 | 6   | 50   | 6.8 | -8.1                 | 697.5 | 1.296                           | 0,0037                                            |

SD: drift time standard deviation.  $n$ : number of measurements.  $fr$ : 2-butanol flow rate,  $\mu\text{L/hr}$ .  $B$ : 2-butanol concentrations (mmol m<sup>-3</sup>) in the buffer gas.  $\Delta K_{0,c}$ : percent reduction in ion mobility when the buffer gas contaminant concentration was increased.  $P$ : pressure, mmHg. The calculation of  $\Delta K_{0,c}$  values is explained in Table S1.

Table S3. Mobility data for valinol (V, 104.2 Da); phenylalanine (Phe, 166.2 Da) and tryptophan (Try, 205.2 Da) at 200°C at different 2-butanol concentrations ( $B$ , mmol m<sup>-3</sup>) in the buffer gas.

| Ion | $K_0$ | $K_0$ RSD | Drift time, ms | SD    | $N$ | $fr$ | $B$ | $\Delta K_{0,c}$ (%) | $P$   | Ko corrected by pressure change | Uncertainty of $K_0$ corrected by pressure change |
|-----|-------|-----------|----------------|-------|-----|------|-----|----------------------|-------|---------------------------------|---------------------------------------------------|
| V   | 1.915 | 0.359     | 16.70          | 0.060 | 4   | 0    | 0   | -                    | 698.0 | 1.909                           | 0,0086                                            |
| V   | 1.904 | 0.060     | 16.79          | 0.010 | 5   | 12.5 | 1.7 | -0.6                 | 698.5 | 1.897                           | 0,0053                                            |
| V   | 1.901 | 0.059     | 16.82          | 0.010 | 5   | 25   | 3.4 | -0.9                 | 699.0 | 1.892                           | 0,0053                                            |
| V   | 1.890 | 0.118     | 16.92          | 0.020 | 5   | 50   | 6.8 | -1.5                 | 699.0 | 1.881                           | 0,0056                                            |
| Phe | 1.589 | 0.099     | 20.12          | 0.020 | 6   | 0    | 0   | -                    | 698.0 | 1.584                           | 0,0046                                            |
| Phe | 1.572 | 0.197     | 20.34          | 0.040 | 6   | 12.5 | 1.7 | -1.1                 | 698.5 | 1.566                           | 0,0053                                            |
| Phe | 1.567 | 0.147     | 20.40          | 0.030 | 5   | 25   | 3.4 | -1.5                 | 699.0 | 1.560                           | 0,0048                                            |
| Phe | 1.551 | 0.097     | 20.61          | 0.020 | 5   | 50   | 6.8 | -2.5                 | 699.0 | 1.544                           | 0,0045                                            |
| Try | 1.448 | 0.136     | 22.08          | 0.030 | 7   | 0    | 0   | -                    | 698.0 | 1.444                           | 0,0044                                            |
| Try | 1.440 | 0.090     | 22.20          | 0.020 | 5   | 12.5 | 1.7 | -0.6                 | 698.5 | 1.435                           | 0,0041                                            |
| Try | 1.436 | 0.045     | 22.27          | 0.010 | 5   | 25   | 3.4 | -1.0                 | 699.0 | 1.429                           | 0,0039                                            |
| Try | 1.431 | 0.224     | 22.35          | 0.050 | 8   | 50   | 6.8 | -1.4                 | 699.0 | 1.424                           | 0,0050                                            |

SD: drift time standard deviation.  $n$ : number of measurements.  $fr$ : 2-butanol flow rate,  $\mu\text{L/hr}$ .  $B$ : 2-butanol concentrations (mmol m<sup>-3</sup>) in the buffer gas.  $\Delta K_{0,c}$ : percent reduction in ion mobility when the buffer gas contaminant concentration was increased.  $P$ : pressure, mmHg. The calculation of  $\Delta K_{0,c}$  values is explained in Table S1.

Table S4. Mobility data for valinol (V, 104.2 Da); phenylalanine (Phe, 166.2 Da) and tryptophan (Try, 205.2 Da) at 250°C at different 2-butanol concentrations ( $B$ , mmol m<sup>-3</sup>) in the buffer gas.

| Ion | $K_0$ | $K_0$ RSD | Drift time, ms | SD    | $n$ | $fr$ | $B$ | $\Delta K_{0,c}$ (%) | $P$   | Ko corrected by pressure change | Uncertainty of $K_0$ corrected by pressure change |
|-----|-------|-----------|----------------|-------|-----|------|-----|----------------------|-------|---------------------------------|---------------------------------------------------|
| V   | 1.976 | 0.200     | 14.92          | 0.030 | 5   | 0    | 0   | -                    | 693.0 | 1.970                           | 0,0067                                            |
| V   | 1.964 | 0.067     | 14.95          | 0.010 | 6   | 12.5 | 1.7 | -0.2                 | 693.0 | 1.966                           | 0,0055                                            |
| V   | 1.975 | 0.400     | 14.93          | 0.060 | 6   | 50   | 6.8 | -0.1                 | 693.0 | 1.969                           | 0,0096                                            |
| Phe | 1.638 | 0.028     | 18.00          | 0.005 | 5   | 0    | 0   | -                    | 693.0 | 1.633                           | 0,0045                                            |
| Phe | 1.628 | 0.110     | 18.03          | 0.020 | 6   | 12.5 | 1.7 | -0.2                 | 693.0 | 1.630                           | 0,0048                                            |
| Phe | 1.627 | 0.110     | 18.12          | 0.020 | 6   | 50   | 6.8 | -0.7                 | 693.0 | 1.622                           | 0,0048                                            |
| Try | 1.479 | 0.150     | 19.93          | 0.030 | 8   | 0    | 0   | -                    | 693.0 | 1.475                           | 0,0046                                            |
| Try | 1.473 | 0.100     | 19.93          | 0.020 | 6   | 12.5 | 1.7 | 0.0                  | 693.0 | 1.475                           | 0,0043                                            |
| Try | 1.478 | 0.150     | 19.95          | 0.030 | 6   | 50   | 6.8 | -0.1                 | 693.0 | 1.473                           | 0,0046                                            |

SD: drift time standard deviation.  $n$ : number of measurements.  $fr$ : 2-butanol flow rate,  $\mu\text{L/hr}$ .  $B$ : 2-butanol concentrations (mmol m<sup>-3</sup>) in the buffer gas.  $\Delta K_{0,c}$ : percent reduction in ion mobility when the buffer gas contaminant concentration was increased.  $P$ : pressure, mmHg. The calculation of  $\Delta K_{0,c}$  values is explained in Table S1.

Table S5. Reduction in ion mobility when the buffer gas temperature was increased from 100 to 250 °C,  $\Delta K_{0,T}$ , for valinol, phenylalanine and tryptophan at different 2-butanol concentrations (\*) in the buffer gas.

| Ion | T, °C | K <sub>0</sub> at different concentrations of 2-butanol in the buffer gas |       |       |       |       |       |       |       | $\Delta K_{0,T}$ (%)± U |     |      |     |      |     |      |     |
|-----|-------|---------------------------------------------------------------------------|-------|-------|-------|-------|-------|-------|-------|-------------------------|-----|------|-----|------|-----|------|-----|
|     |       | 0*                                                                        | U     | 1.7*  | U     | 3.4*  | U     | 6.8*  | U     | 0*                      | U   | 1.7* | U   | 3.4* | U   | 6.8* | U   |
| V   | 100   | 1.779                                                                     | 0.006 | 1.604 | 0.006 | 1.567 | 0.005 | 1.527 | 0.004 |                         |     |      |     |      |     |      |     |
| V   | 150   | 1.845                                                                     | 0.006 | 1.783 | 0.006 | 1.731 | 0.006 | 1.671 | 0.005 | 3.7                     | 0.5 | 11.2 | 0.6 | 10.5 | 0.5 | 9.4  | 0.4 |
| V   | 200   | 1.909                                                                     | 0.009 | 1.897 | 0.005 | 1.892 | 0.005 | 1.881 | 0.006 | 7.3                     | 0.6 | 18.3 | 0.5 | 20.7 | 0.5 | 23.2 | 0.5 |
| V   | 250   | 1.970                                                                     | 0.007 | 1.966 | 0.006 |       |       | 1.969 | 0.010 | 10.7                    | 0.5 | 22.6 | 0.5 |      |     | 28.9 | 0.7 |
| Phe | 100   | 1.462                                                                     | 0.005 | 1.347 | 0.005 | 1.322 | 0.004 | 1.288 | 0.004 |                         |     |      |     |      |     |      |     |
| Phe | 150   | 1.545                                                                     | 0.005 | 1.442 | 0.004 | 1.399 | 0.004 | 1.365 | 0.004 | 5.7                     | 0.4 | 7.1  | 0.5 | 5.8  | 0.4 | 6.0  | 0.5 |
| Phe | 200   | 1.584                                                                     | 0.005 | 1.566 | 0.005 | 1.560 | 0.005 | 1.544 | 0.004 | 8.3                     | 0.4 | 16.3 | 0.5 | 18.0 | 0.5 | 19.9 | 0.5 |
| Phe | 250   | 1.633                                                                     | 0.004 | 1.630 | 0.005 |       |       | 1.622 | 0.005 | 11.7                    | 0.4 | 21.0 | 0.5 |      |     | 25.9 | 0.5 |
| Try | 100   | 1.358                                                                     | 0.005 | 1.272 | 0.004 | 1.250 | 0.003 | 1.218 | 0.003 |                         |     |      |     |      |     |      |     |
| Try | 150   | 1.410                                                                     | 0.004 | 1.357 | 0.004 | 1.329 | 0.004 | 1.296 | 0.004 | 3.8                     | 0.5 | 6.7  | 0.5 | 6.3  | 0.4 | 6.4  | 0.4 |
| Try | 200   | 1.444                                                                     | 0.004 | 1.435 | 0.004 | 1.429 | 0.004 | 1.424 | 0.005 | 6.3                     | 0.5 | 12.8 | 0.4 | 14.3 | 0.4 | 16.9 | 0.5 |
| Try | 250   | 1.475                                                                     | 0.005 | 1.475 | 0.004 |       |       | 1.473 | 0.005 | 8.6                     | 0.5 | 16.0 | 0.5 |      |     | 20.9 | 0.5 |

U: uncertainty. \* 2-butanol concentration in mmol m<sup>-3</sup>.  $\Delta K_{0,T}$ : percent reduction in ion mobility when the buffer gas temperature was increased; the values of  $\Delta K_{0,T}$  for valinol were obtained as follows, for example: 3.7 =  $\{(1.845-1.779)/1.779\} \times 100$ ; 7.3 =  $\{(1.909-1.779)/1.779\} \times 100$  etc. Other data of this set are in tables S1-S4. The first value for  $\Delta K_{0,T}$ , 3.7%, is the change in mobility for valinol when 2-butanol was absent from the buffer gas and the temperature was changed from 100 to 150°C; the value of -7.3% is a similar calculation but the temperature was changed from 100 to 200°C.

**Table S6.** Mobility shifts for valinol (V, 104.2 Da), phenylalanine (Phe, 166.2 Da), and tryptophan (Try, 205.2 Da) at four different 2-butanol concentrations (1.7, 3.4, 5.1, and 6.8 mmol m<sup>-3</sup> or 0.065, 0.131, 0.196, and 0.261 ppmv, respectively) in the buffer gas at 100, 150, 200, and 250°C.

| Ion | T,<br>°C | K <sub>0</sub> at different concentrations of 2-butanol in the buffer gas |     |       |     |       |     |       |     |       |     | ΔK <sub>0,c</sub> (%) |     |       |     |       |     |       |     |
|-----|----------|---------------------------------------------------------------------------|-----|-------|-----|-------|-----|-------|-----|-------|-----|-----------------------|-----|-------|-----|-------|-----|-------|-----|
|     |          | 0*                                                                        | U   | 1.7*  | U   | 3.4*  | U   | 5,1   | U   | 6.9*  | U   | 1.7*                  | U   | 3.4*  | U   | 5,1   | U   | 6.9*  | U   |
| V   | 100      | 1.779                                                                     | 6.3 | 1.604 | 6.4 | 1.567 | 5.3 | -     | -   | 1.527 | 4.2 | -9.8                  | 0.5 | -11.9 | 0.5 | -     | -   | -14.2 | 0.4 |
| Phe | 100      | 1.462                                                                     | 4.5 | 1.347 | 4.7 | 1.322 | 4.1 | -     | -   | 1.288 | 4.1 | -7.9                  | 0.4 | -9.6  | 0.4 | -     | -   | -11.9 | 0.4 |
| Try | 100      | 1.358                                                                     | 4.7 | 1.272 | 3.8 | 1.250 | 3.4 | -     | -   | 1.218 | 3.4 | -6.3                  | 0.4 | -8.0  | 0.4 | -     | -   | -10.3 | 0.4 |
| V   | 150      | 1.845                                                                     | 5.4 | 1.783 | 6.1 | 1.731 | 5.8 | 1.703 | 5.7 | 1.671 | 5.1 | -3.4                  | 0.4 | -6.2  | 0.4 | -7.7  | 0.4 | -9.4  | 0.4 |
| Phe | 150      | 1.545                                                                     | 4.7 | 1.442 | 4.3 | 1.399 | 4.2 | 1.383 | 4.4 | 1.365 | 4.0 | -6.7                  | 0.4 | -9.4  | 0.4 | -10.5 | 0.4 | -11.7 | 0.4 |
| Try | 150      | 1.410                                                                     | 4.2 | 1.357 | 4.3 | 1.329 | 3.8 | 1.311 | 4.1 | 1.296 | 3.7 | -3.8                  | 0.4 | -5.7  | 0.4 | -7.0  | 0.4 | -8.1  | 0.4 |
| V   | 200      | 1.909                                                                     | 8.6 | 1.897 | 5.3 | 1.892 | 5.3 | -     | -   | 1.881 | 5.6 | -0.6                  | 0.5 | -0.9  | 0.5 | -     | -   | -1.5  | 0.5 |
| Phe | 200      | 1.584                                                                     | 4.6 | 1.566 | 5.3 | 1.560 | 4.8 | -     | -   | 1.544 | 4.5 | -1.1                  | 0.4 | -1.5  | 0.4 | -     | -   | -2.5  | 0.4 |
| Try | 200      | 1.444                                                                     | 4.4 | 1.435 | 4.1 | 1.429 | 3.9 | -     | -   | 1.424 | 5.0 | -0.6                  | 0.4 | -1.0  | 0.4 | -     | -   | -1.4  | 0.5 |
| V   | 250      | 1.970                                                                     | 7.0 | 1.966 | 6.0 | -     | -   | -     | -   | 1.969 | 1.0 | -0.2                  | 0.4 | -     | -   | -     | -   | -0.1  | 0.6 |
| Phe | 250      | 1.633                                                                     | 4.0 | 1.630 | 5.0 | -     | -   | -     | -   | 1.622 | 5.0 | -0.2                  | 0.4 | -     | -   | -     | -   | -0.7  | 0.4 |
| Try | 250      | 1.475                                                                     | 4.6 | 1.475 | 4.0 | -     | -   | -     | -   | 1.473 | 5.0 | 0.0                   | 0.4 | -     | -   | -     | -   | -0.1  | 0.4 |

U: uncertainty. *U*: uncertaintyx10<sup>-3</sup>. ΔK<sub>0,c</sub>: percent reduction in ion mobility with 2-butanol concentration. *B*: 2-butanol concentrations (mmol m<sup>-3</sup>) in the buffer gas. *T*: drift tube temperature. The complete data set is shown in Tables S1 to S4 (Supplementary information) including the experimental conditions, number of experiments, drift times, reduced mobilities, and statistical information from the measurements.<sup>28</sup>

Concentrations of 2-butanol in ppmv were 0.065, 0.131, 0.196, and 0.261 for 1.7, 3.4, 5.1, and 6.8 mmol m<sup>-3</sup>, respectively.
